# Supplementary material for: Toxicity of nano- and ionic silver to embryonic stem cells: a comparative toxicogenomic study
Source: J Nanobiotechnology. 2017 Apr 11;15:31. doi: 10.1186/s12951-017-0265-6 (PMC5387260; doi:10.1186/s12951-017-0265-6)
Supplement: Supplementary file 6 — Additional file 6: Table S4. Lists of 120 GO terms in the biological process (BP) category enriched from the 101 genes regulated by AgNPs. DAVID was used for the analysis. The Mus musculus (mouse) whole genome was used as background. Statistical enrichment was determined through a modified Fisher’s exact test (p < 0.1) and count threshold >2 (default settings in DAVID). [file 12951_2017_265_MOESM6_ESM.xlsx]

## Sheet: Supplementary Table 4
Supplementary Table 4. Lists of 120 GO terms in the biological process (BP) category enriched from the 101 genes regulated by AgNPs. DAVID was used for the analysis. The Mus musculus (mouse) whole genome was used as background. Statistical enrichment was determined through a modified Fisher’s exact test (p < 0.1) and count threshold > 2 (default settings in DAVID).
Category	Term	Name	Count	%	PValue	Genes	List Total	Pop Hits	Pop Total	Fold Enrichment	Bonferroni	Benjamini	FDR
GOTERM_BP_FAT	GO:0003007	heart morphogenesis	10	10.4167	6.39149e-11	474561, 475169, 440729, 461363, 472456, 448266, 477116, 449662, 456564, 422039	66	74	13588	27.8215	4.62744e-08	4.62744e-08	9.68226e-08
GOTERM_BP_FAT	GO:0007507	heart development	13	13.5417	5.31788e-10	474561, 475169, 440729, 421789, 461363, 437453, 472456, 448266, 477116, 449662, 456564, 422039, 475651	66	223	13588	12.0019	3.85014e-07	1.92507e-07	8.05587e-07
GOTERM_BP_FAT	GO:0001568	blood vessel development	11	11.4583	2.18301e-07	474561, 440729, 472456, 448266, 477116, 449662, 451524, 456564, 422039, 475651, 432000	66	244	13588	9.28142	0.000158038	5.2682e-05	0.000330696
GOTERM_BP_FAT	GO:0001944	vasculature development	11	11.4583	2.73426e-07	474561, 440729, 472456, 448266, 477116, 449662, 451524, 456564, 422039, 475651, 432000	66	250	13588	9.05867	0.000197941	4.94888e-05	0.000414203
GOTERM_BP_FAT	GO:0048514	blood vessel morphogenesis	9	9.375	4.37415e-06	474561, 440729, 472456, 477116, 449662, 451524, 456564, 475651, 432000	66	198	13588	9.35813	0.00316188	0.000633178	0.00662605
GOTERM_BP_FAT	GO:0048729	tissue morphogenesis	9	9.375	1.68117e-05	440729, 436579, 472456, 446066, 448266, 477116, 456564, 422039, 475651	66	238	13588	7.78533	0.012098	0.00202657	0.0254644
GOTERM_BP_FAT	GO:0048332	mesoderm morphogenesis	5	5.20833	3.11514e-05	436579, 472456, 477116, 456564, 422039	66	38	13588	27.0893	0.0223015	0.00321681	0.0471798
GOTERM_BP_FAT	GO:0035295	tube development	9	9.375	3.53674e-05	474561, 472456, 448266, 477116, 449662, 456564, 422039, 475651, 432000	66	264	13588	7.0186	0.0252814	0.00319569	0.0535635
GOTERM_BP_FAT	GO:0048010	vascular endothelial growth factor receptor signaling pathway	4	4.16667	3.66268e-05	472456, 456564, 475651, 432000	66	14	13588	58.8225	0.0261697	0.00294214	0.0554703
GOTERM_BP_FAT	GO:0001525	angiogenesis	7	7.29167	4.04041e-05	474561, 477116, 449662, 451524, 456564, 475651, 432000	66	133	13588	10.8357	0.0288295	0.00292104	0.0611894
GOTERM_BP_FAT	GO:0007167	enzyme linked receptor protein signaling pathway	9	9.375	4.48699e-05	475169, 440729, 461363, 472456, 469585, 470338, 456564, 475651, 432000	66	273	13588	6.78721	0.0319645	0.00294897	0.0679504
GOTERM_BP_FAT	GO:0055010	ventricular cardiac muscle morphogenesis	4	4.16667	4.5627e-05	440729, 472456, 477116, 456564	66	15	13588	54.901	0.032495	0.00274911	0.0690965
GOTERM_BP_FAT	GO:0035050	embryonic heart tube development	4	4.16667	5.59645e-05	472456, 477116, 449662, 456564	66	16	13588	51.4697	0.0397095	0.00311203	0.0847452
GOTERM_BP_FAT	GO:0055008	cardiac muscle tissue morphogenesis	4	4.16667	8.09923e-05	440729, 472456, 477116, 456564	66	18	13588	45.7508	0.0569545	0.00417987	0.122622
GOTERM_BP_FAT	GO:0060415	muscle tissue morphogenesis	4	4.16667	8.09923e-05	440729, 472456, 477116, 456564	66	18	13588	45.7508	0.0569545	0.00417987	0.122622
GOTERM_BP_FAT	GO:0035239	tube morphogenesis	7	7.29167	0.000162577	474561, 477116, 449662, 456564, 422039, 475651, 432000	66	171	13588	8.42779	0.111051	0.00781698	0.245999
GOTERM_BP_FAT	GO:0007498	mesoderm development	5	5.20833	0.000178146	436579, 472456, 477116, 456564, 422039	66	59	13588	17.4474	0.121016	0.0080294	0.269527
GOTERM_BP_FAT	GO:0008015	blood circulation	6	6.25	0.000185826	464595, 421789, 472456, 449662, 451524, 456564	66	111	13588	11.1286	0.125891	0.00788351	0.281132
GOTERM_BP_FAT	GO:0003013	circulatory system process	6	6.25	0.000185826	464595, 421789, 472456, 449662, 451524, 456564	66	111	13588	11.1286	0.125891	0.00788351	0.281132
GOTERM_BP_FAT	GO:0001947	heart looping	4	4.16667	0.000251103	474561, 477116, 449662, 422039	66	26	13588	31.6737	0.16625	0.0100503	0.379713
GOTERM_BP_FAT	GO:0048598	embryonic morphogenesis	9	9.375	0.000297906	475169, 438336, 436579, 461363, 472456, 448266, 477116, 456564, 422039	66	359	13588	5.16131	0.194036	0.0112893	0.450337
GOTERM_BP_FAT	GO:0007389	pattern specification process	8	8.33333	0.000399707	438336, 472456, 448266, 449662, 435197, 456564, 422039, 475651	66	284	13588	5.7994	0.251322	0.0143681	0.603794
GOTERM_BP_FAT	GO:0014032	neural crest cell development	4	4.16667	0.00051449	474561, 472456, 448266, 456564	66	33	13588	24.955	0.31105	0.0175857	0.776552
GOTERM_BP_FAT	GO:0014033	neural crest cell differentiation	4	4.16667	0.00051449	474561, 472456, 448266, 456564	66	33	13588	24.955	0.31105	0.0175857	0.776552
GOTERM_BP_FAT	GO:0001707	mesoderm formation	4	4.16667	0.000666434	436579, 472456, 477116, 456564	66	36	13588	22.8754	0.38286	0.0217001	1.00481
GOTERM_BP_FAT	GO:0001704	formation of primary germ layer	4	4.16667	0.000909694	436579, 472456, 477116, 456564	66	40	13588	20.5879	0.482589	0.0282421	1.36923
GOTERM_BP_FAT	GO:0048754	branching morphogenesis of a tube	5	5.20833	0.00101206	449662, 456564, 422039, 475651, 432000	66	93	13588	11.0688	0.519583	0.0300841	1.5222
GOTERM_BP_FAT	GO:0014031	mesenchymal cell development	4	4.16667	0.00145782	474561, 472456, 448266, 456564	66	47	13588	17.5216	0.652237	0.0413693	2.18578
GOTERM_BP_FAT	GO:0007517	muscle organ development	6	6.25	0.00151862	475169, 440729, 437453, 472456, 477116, 456564	66	176	13588	7.0186	0.667234	0.0414368	2.27595
GOTERM_BP_FAT	GO:0050880	regulation of blood vessel size	4	4.16667	0.00154973	464595, 421789, 472456, 456564	66	48	13588	17.1566	0.674657	0.040735	2.32207
GOTERM_BP_FAT	GO:0035150	regulation of tube size	4	4.16667	0.00154973	464595, 421789, 472456, 456564	66	48	13588	17.1566	0.674657	0.040735	2.32207
GOTERM_BP_FAT	GO:0048762	mesenchymal cell differentiation	4	4.16667	0.00164519	474561, 472456, 448266, 456564	66	49	13588	16.8064	0.696417	0.0416814	2.46345
GOTERM_BP_FAT	GO:0060485	mesenchyme development	4	4.16667	0.00174426	474561, 472456, 448266, 456564	66	50	13588	16.4703	0.717464	0.0426483	2.60997
GOTERM_BP_FAT	GO:0003018	vascular process in circulatory system	4	4.16667	0.00174426	464595, 421789, 472456, 456564	66	50	13588	16.4703	0.717464	0.0426483	2.60997
GOTERM_BP_FAT	GO:0048844	artery morphogenesis	3	3.125	0.00197583	440729, 472456, 456564	66	14	13588	44.1169	0.761149	0.0466093	2.95164
GOTERM_BP_FAT	GO:0035282	segmentation	4	4.16667	0.00217757	438336, 472456, 456564, 422039	66	54	13588	15.2503	0.79367	0.0496379	3.24839
GOTERM_BP_FAT	GO:0048738	cardiac muscle tissue development	4	4.16667	0.00254272	440729, 472456, 477116, 456564	66	57	13588	14.4476	0.841702	0.0559747	3.78336
GOTERM_BP_FAT	GO:0001763	morphogenesis of a branching structure	5	5.20833	0.00299737	449662, 456564, 422039, 475651, 432000	66	125	13588	8.23515	0.886205	0.0637374	4.44559
GOTERM_BP_FAT	GO:0014706	striated muscle tissue development	5	5.20833	0.00317367	440729, 437453, 472456, 477116, 456564	66	127	13588	8.10546	0.899881	0.065448	4.70123
GOTERM_BP_FAT	GO:0003002	regionalization	6	6.25	0.00354941	438336, 472456, 448266, 449662, 456564, 422039	66	214	13588	5.7723	0.923796	0.0709128	5.24395
GOTERM_BP_FAT	GO:0060537	muscle tissue development	5	5.20833	0.00405504	440729, 437453, 472456, 477116, 456564	66	136	13588	7.56907	0.94723	0.0784675	5.96972
GOTERM_BP_FAT	GO:0007369	gastrulation	4	4.16667	0.0053177	436579, 472456, 477116, 456564	66	74	13588	11.1286	0.978938	0.099074	7.75951
GOTERM_BP_FAT	GO:0045165	cell fate commitment	5	5.20833	0.00534084	438336, 436579, 477116, 456564, 432000	66	147	13588	7.00268	0.97929	0.0969974	7.79201
GOTERM_BP_FAT	GO:0043066	negative regulation of apoptosis	6	6.25	0.00565815	475169, 461363, 472456, 456564, 422039, 482833	66	239	13588	5.16851	0.983562	0.0999787	8.23662
GOTERM_BP_FAT	GO:0001569	patterning of blood vessels	3	3.125	0.00581092	449662, 456564, 475651	66	24	13588	25.7348	0.985292	0.100111	8.44995
GOTERM_BP_FAT	GO:0009952	anterior/posterior pattern formation	5	5.20833	0.00614571	438336, 472456, 448266, 456564, 422039	66	153	13588	6.72806	0.988475	0.103143	8.91586
GOTERM_BP_FAT	GO:0007178	transmembrane receptor protein serine/threonine kinase signaling pathway	4	4.16667	0.00615683	475169, 440729, 461363, 470338	66	78	13588	10.5579	0.988568	0.100989	8.9313
GOTERM_BP_FAT	GO:0043069	negative regulation of programmed cell death	6	6.25	0.0061675	475169, 461363, 472456, 456564, 422039, 482833	66	244	13588	5.06259	0.988656	0.0989234	8.94611
GOTERM_BP_FAT	GO:0060548	negative regulation of cell death	6	6.25	0.00627312	475169, 461363, 472456, 456564, 422039, 482833	66	245	13588	5.04193	0.989496	0.0983659	9.09259
GOTERM_BP_FAT	GO:0006916	anti-apoptosis	4	4.16667	0.00858579	472456, 456564, 422039, 482833	66	88	13588	9.35813	0.998056	0.129539	12.2453
GOTERM_BP_FAT	GO:0001701	in utero embryonic development	6	6.25	0.00893209	474561, 475169, 438336, 472456, 477116, 422039	66	267	13588	4.62649	0.99849	0.131697	12.7085
GOTERM_BP_FAT	GO:0007263	nitric oxide mediated signal transduction	2	2.08333	0.00954473	477309, 470124	66	2	13588	205.879	0.999035	0.137341	13.5224
GOTERM_BP_FAT	GO:0007166	cell surface receptor linked signal transduction	21	21.875	0.0105975	475169, 440729, 438336, 478819, 432860, 461363, 460174, 473989, 444780, 468158, 469585, 429682, 427630, 464595, 472638, 472456, 470338, 456564, 475651, 444368, 432000	66	2495	13588	1.73285	0.999553	0.148451	14.9043
GOTERM_BP_FAT	GO:0035113	embryonic appendage morphogenesis	4	4.16667	0.0111908	475169, 461363, 448266, 422039	66	97	13588	8.48985	0.999711	0.153192	15.6741
GOTERM_BP_FAT	GO:0030326	embryonic limb morphogenesis	4	4.16667	0.0111908	475169, 461363, 448266, 422039	66	97	13588	8.48985	0.999711	0.153192	15.6741
GOTERM_BP_FAT	GO:0050801	ion homeostasis	6	6.25	0.0129783	464595, 440729, 477309, 470124, 473492, 432000	66	293	13588	4.21595	0.999922	0.172343	17.9541
GOTERM_BP_FAT	GO:0007169	transmembrane receptor protein tyrosine kinase signaling pathway	5	5.20833	0.0133849	472456, 469585, 456564, 475651, 432000	66	192	13588	5.36143	0.999942	0.174112	18.4645
GOTERM_BP_FAT	GO:0010273	detoxification of copper ion	2	2.08333	0.0142834	477309, 470124	66	3	13588	137.253	0.99997	0.181517	19.5822
GOTERM_BP_FAT	GO:0045893	positive regulation of transcription, DNA-dependent	7	7.29167	0.0143365	474561, 475169, 472456, 477116, 449662, 456564, 422039	66	416	13588	3.46431	0.999971	0.179022	19.6478
GOTERM_BP_FAT	GO:0051254	positive regulation of RNA metabolic process	7	7.29167	0.0148075	474561, 475169, 472456, 477116, 449662, 456564, 422039	66	419	13588	3.4395	0.99998	0.181281	20.2275
GOTERM_BP_FAT	GO:0043009	chordate embryonic development	7	7.29167	0.0151274	474561, 475169, 438336, 472456, 477116, 456564, 422039	66	421	13588	3.42316	0.999984	0.181804	20.619
GOTERM_BP_FAT	GO:0009792	embryonic development ending in birth or egg hatching	7	7.29167	0.0157818	474561, 475169, 438336, 472456, 477116, 456564, 422039	66	425	13588	3.39094	0.99999	0.185893	21.4142
GOTERM_BP_FAT	GO:0001756	somitogenesis	3	3.125	0.0163879	438336, 472456, 456564	66	41	13588	15.0643	0.999994	0.189318	22.1441
GOTERM_BP_FAT	GO:0035108	limb morphogenesis	4	4.16667	0.017639	475169, 461363, 448266, 422039	66	115	13588	7.161	0.999997	0.199203	23.6308
GOTERM_BP_FAT	GO:0035107	appendage morphogenesis	4	4.16667	0.017639	475169, 461363, 448266, 422039	66	115	13588	7.161	0.999997	0.199203	23.6308
GOTERM_BP_FAT	GO:0048736	appendage development	4	4.16667	0.0193008	475169, 461363, 448266, 422039	66	119	13588	6.9203	0.999999	0.21271	25.5646
GOTERM_BP_FAT	GO:0060173	limb development	4	4.16667	0.0193008	475169, 461363, 448266, 422039	66	119	13588	6.9203	0.999999	0.21271	25.5646
GOTERM_BP_FAT	GO:0042592	homeostatic process	8	8.33333	0.0210797	464595, 440729, 477309, 470124, 475904, 482833, 473492, 432000	66	584	13588	2.82026	1	0.226694	27.584
GOTERM_BP_FAT	GO:0019725	cellular homeostasis	6	6.25	0.0239315	464595, 440729, 477309, 470124, 475904, 473492	66	343	13588	3.60138	1	0.249858	30.7148
GOTERM_BP_FAT	GO:0045941	positive regulation of transcription	7	7.29167	0.0256901	474561, 475169, 472456, 477116, 449662, 456564, 422039	66	475	13588	3.034	1	0.262076	32.5819
GOTERM_BP_FAT	GO:0007219	Notch signaling pathway	3	3.125	0.0274875	438336, 472456, 456564	66	54	13588	11.4377	1	0.274076	34.4416
GOTERM_BP_FAT	GO:0048341	paraxial mesoderm formation	2	2.08333	0.0283659	472456, 456564	66	6	13588	68.6263	1	0.277854	35.3329
GOTERM_BP_FAT	GO:0001945	lymph vessel development	2	2.08333	0.0283659	472456, 456564	66	6	13588	68.6263	1	0.277854	35.3329
GOTERM_BP_FAT	GO:0010628	positive regulation of gene expression	7	7.29167	0.0288249	474561, 475169, 472456, 477116, 449662, 456564, 422039	66	488	13588	2.95318	1	0.278038	35.7941
GOTERM_BP_FAT	GO:0045449	regulation of transcription	18	18.75	0.0299749	475169, 474561, 440729, 436579, 461363, 477116, 451524, 464852, 481351, 472456, 453218, 446066, 424588, 463162, 449662, 470338, 456564, 422039	66	2227	13588	1.66404	1	0.283835	36.9362
GOTERM_BP_FAT	GO:0048878	chemical homeostasis	6	6.25	0.0302184	464595, 440729, 477309, 470124, 473492, 432000	66	365	13588	3.38431	1	0.282207	37.1756
GOTERM_BP_FAT	GO:0046545	development of primary female sexual characteristics	3	3.125	0.0303786	472456, 422039, 432000	66	57	13588	10.8357	1	0.279966	37.3326
GOTERM_BP_FAT	GO:0055066	di-, tri-valent inorganic cation homeostasis	4	4.16667	0.0327191	464595, 477309, 470124, 432000	66	146	13588	5.64051	1	0.294646	39.5855
GOTERM_BP_FAT	GO:0046688	response to copper ion	2	2.08333	0.0330159	477309, 470124	66	7	13588	58.8225	1	0.293366	39.8657
GOTERM_BP_FAT	GO:0006882	cellular zinc ion homeostasis	2	2.08333	0.0330159	477309, 470124	66	7	13588	58.8225	1	0.293366	39.8657
GOTERM_BP_FAT	GO:0014855	striated muscle cell proliferation	2	2.08333	0.0330159	472456, 456564	66	7	13588	58.8225	1	0.293366	39.8657
GOTERM_BP_FAT	GO:0060419	heart growth	2	2.08333	0.0330159	472456, 456564	66	7	13588	58.8225	1	0.293366	39.8657
GOTERM_BP_FAT	GO:0060038	cardiac muscle cell proliferation	2	2.08333	0.0330159	472456, 456564	66	7	13588	58.8225	1	0.293366	39.8657
GOTERM_BP_FAT	GO:0055017	cardiac muscle tissue growth	2	2.08333	0.0330159	472456, 456564	66	7	13588	58.8225	1	0.293366	39.8657
GOTERM_BP_FAT	GO:0045935	positive regulation of nucleobase, nucleoside, nucleotide and nucleic acid metabolic process	7	7.29167	0.0346909	474561, 475169, 472456, 477116, 449662, 456564, 422039	66	510	13588	2.82579	1	0.302345	41.4244
GOTERM_BP_FAT	GO:0006873	cellular ion homeostasis	5	5.20833	0.036168	464595, 440729, 477309, 470124, 473492	66	261	13588	3.94404	1	0.309562	42.7676
GOTERM_BP_FAT	GO:0046660	female sex differentiation	3	3.125	0.0375664	472456, 422039, 432000	66	64	13588	9.65057	1	0.315971	44.0127
GOTERM_BP_FAT	GO:0055069	zinc ion homeostasis	2	2.08333	0.037644	477309, 470124	66	8	13588	51.4697	1	0.312994	44.081
GOTERM_BP_FAT	GO:0006350	transcription	15	15.625	0.0382791	475169, 474561, 440729, 436579, 477116, 472456, 481351, 446066, 453218, 424588, 449662, 463162, 456564, 470338, 422039	66	1772	13588	1.74277	1	0.313932	44.6375
GOTERM_BP_FAT	GO:0008217	regulation of blood pressure	3	3.125	0.0386417	464595, 421789, 451524	66	65	13588	9.5021	1	0.312995	44.9528
GOTERM_BP_FAT	GO:0055082	cellular chemical homeostasis	5	5.20833	0.039259	464595, 440729, 477309, 470124, 473492	66	268	13588	3.84102	1	0.313794	45.4858
GOTERM_BP_FAT	GO:0051173	positive regulation of nitrogen compound metabolic process	7	7.29167	0.039414	474561, 475169, 472456, 477116, 449662, 456564, 422039	66	526	13588	2.73983	1	0.311505	45.619
GOTERM_BP_FAT	GO:0060429	epithelium development	5	5.20833	0.0406289	471852, 448266, 422039, 475651, 432000	66	271	13588	3.7985	1	0.316221	46.6515
GOTERM_BP_FAT	GO:0010557	positive regulation of macromolecule biosynthetic process	7	7.29167	0.0406562	474561, 475169, 472456, 477116, 449662, 456564, 422039	66	530	13588	2.71915	1	0.313142	46.6746
GOTERM_BP_FAT	GO:0033002	muscle cell proliferation	2	2.08333	0.0422502	472456, 456564	66	9	13588	45.7508	1	0.32013	48.0011
GOTERM_BP_FAT	GO:0048340	paraxial mesoderm morphogenesis	2	2.08333	0.0422502	472456, 456564	66	9	13588	45.7508	1	0.32013	48.0011
GOTERM_BP_FAT	GO:0042127	regulation of cell proliferation	7	7.29167	0.0432153	475169, 461363, 468594, 448266, 451524, 422039, 432000	66	538	13588	2.67872	1	0.322977	48.7893
GOTERM_BP_FAT	GO:0006355	regulation of transcription, DNA-dependent	13	13.5417	0.0432574	474561, 475169, 440729, 436579, 461363, 472456, 453218, 446066, 477116, 449662, 470338, 456564, 422039	66	1465	13588	1.82691	1	0.320049	48.8234
GOTERM_BP_FAT	GO:0032504	multicellular organism reproduction	6	6.25	0.0457081	464595, 477720, 472456, 468848, 482833, 432000	66	409	13588	3.02023	1	0.331854	50.7736
GOTERM_BP_FAT	GO:0048609	reproductive process in a multicellular organism	6	6.25	0.0457081	464595, 477720, 472456, 468848, 482833, 432000	66	409	13588	3.02023	1	0.331854	50.7736
GOTERM_BP_FAT	GO:0051148	negative regulation of muscle cell differentiation	2	2.08333	0.0468348	481351, 422039	66	10	13588	41.1758	1	0.335398	51.6467
GOTERM_BP_FAT	GO:0001501	skeletal system development	5	5.20833	0.0473806	475169, 472456, 435197, 456564, 422039	66	285	13588	3.61191	1	0.335445	52.0645
GOTERM_BP_FAT	GO:0051252	regulation of RNA metabolic process	13	13.5417	0.0478312	474561, 475169, 440729, 436579, 461363, 472456, 453218, 446066, 477116, 449662, 470338, 456564, 422039	66	1488	13588	1.79867	1	0.33494	52.4068
GOTERM_BP_FAT	GO:0031328	positive regulation of cellular biosynthetic process	7	7.29167	0.0479356	474561, 475169, 472456, 477116, 449662, 456564, 422039	66	552	13588	2.61078	1	0.332453	52.4858
GOTERM_BP_FAT	GO:0042981	regulation of apoptosis	7	7.29167	0.0482847	475169, 461363, 472456, 451524, 456564, 422039, 482833	66	553	13588	2.60606	1	0.331412	52.749
GOTERM_BP_FAT	GO:0009891	positive regulation of biosynthetic process	7	7.29167	0.0496967	474561, 475169, 472456, 477116, 449662, 456564, 422039	66	557	13588	2.58735	1	0.336388	53.7999
GOTERM_BP_FAT	GO:0043067	regulation of programmed cell death	7	7.29167	0.0507725	475169, 461363, 472456, 451524, 456564, 422039, 482833	66	560	13588	2.57348	1	0.339372	54.5859
GOTERM_BP_FAT	GO:0010941	regulation of cell death	7	7.29167	0.0518627	475169, 461363, 472456, 451524, 456564, 422039, 482833	66	563	13588	2.55977	1	0.342362	55.3696
GOTERM_BP_FAT	GO:0045596	negative regulation of cell differentiation	4	4.16667	0.0564631	438336, 481351, 422039, 475651	66	182	13588	4.52481	1	0.363938	58.5399
GOTERM_BP_FAT	GO:0055080	cation homeostasis	4	4.16667	0.0579705	464595, 477309, 470124, 432000	66	184	13588	4.47563	1	0.368692	59.532
GOTERM_BP_FAT	GO:0048339	paraxial mesoderm development	2	2.08333	0.0649579	472456, 456564	66	14	13588	29.4113	1	0.400619	63.8481
GOTERM_BP_FAT	GO:0007276	gamete generation	5	5.20833	0.0736914	464595, 477720, 472456, 468848, 482833	66	331	13588	3.10995	1	0.438587	68.6388
GOTERM_BP_FAT	GO:0010604	positive regulation of macromolecule metabolic process	7	7.29167	0.0814287	474561, 475169, 472456, 477116, 449662, 456564, 422039	66	633	13588	2.2767	1	0.469509	72.3809
GOTERM_BP_FAT	GO:0045137	development of primary sexual characteristics	3	3.125	0.0884875	472456, 422039, 432000	66	104	13588	5.93881	1	0.495645	75.427
GOTERM_BP_FAT	GO:0055065	metal ion homeostasis	3	3.125	0.0913931	464595, 477309, 432000	66	106	13588	5.82676	1	0.503867	76.5873
GOTERM_BP_FAT	GO:0001503	ossification	3	3.125	0.0913931	472456, 435197, 456564	66	106	13588	5.82676	1	0.503867	76.5873
GOTERM_BP_FAT	GO:0008285	negative regulation of cell proliferation	4	4.16667	0.091946	475169, 461363, 468594, 451524	66	224	13588	3.67641	1	0.502574	76.8021
GOTERM_BP_FAT	GO:0045944	positive regulation of transcription from RNA polymerase II promoter	5	5.20833	0.0919868	474561, 475169, 472456, 477116, 456564	66	358	13588	2.8754	1	0.499284	76.8179
GOTERM_BP_FAT	GO:0030199	collagen fibril organization	2	2.08333	0.0958606	472456, 456564	66	21	13588	19.6075	1	0.510946	78.2717
GOTERM_BP_FAT	GO:0006928	cell motion	5	5.20833	0.0985308	472456, 464190, 429682, 475651, 432000	66	367	13588	2.80489	1	0.51767	79.2238
